# Supplementary material for: Prussian blue without coordinated water as a superior cathode for sodium-ion batteries
Source: Royal Society of Chemistry journal article supplement (doi:10.1039/c5cc01180a), 2015-01-01
Supplement: c5cc01180a1.pdf [file c5cc01180a1.pdf]

## Supporting Information

### Prussian Blue without Coordinated Water as Superior Cathode for Sodium-Ion Batteries

Dezhi Yang, Jing Xu, Xiao-Zhen Liao,\* Hong Wang, Yu-Shi He and Zi-Feng Ma\*

#### S1. Experimental

In a typical synthesis of PB, 1 M  $\text{Na}_4\text{Fe}(\text{CN})_6$  was dissolved in 0.1 M  $\text{H}_2\text{SO}_4$  aqueous solution at room temperature and then maintained at 80°C for 3 h to form micro-cubic PB particles. The solid product was collected by centrifugation and washed six times with Milli-Q water. The final PB product was then dried in a vacuum oven. The GO was synthesised by a modified Hummer's method.<sup>[1]</sup> To prepare GOPCs, the GO and PB were stirred together in an aqueous solution to form slurries with different GO and PB contents. Thereafter, the slurries were ultrasonically dispersed for 10 min, and then spray-dried to obtain the GOPCs. The dried GOPCs were heated under an air atmosphere at 220°C for 3 h to form RGOPCs.

For a typical coin cell, the cathodes were composed of 70 wt.% active material (PB or RGOPCs), 20 wt.% super P, and 10 wt.% polyvinylidene fluoride (PVDF). The cathode active material loading was 3-4  $\text{mg cm}^{-2}$ . The cathodes were incorporated into coin cells (R2016) with sodium metal foil as the anode and 1.0 M  $\text{NaClO}_4/\text{EC}+\text{DMC}$  (1:1, v/v) as the electrolyte in an argon-filled glove box.

The morphologies of the samples were analysed by scanning electron microscopy (Sirion 200, FEI Company). The structural characteristic of the samples were measured by the X-ray diffraction (D/max-2200/PC, Rigaku Co., Ltd.) in equal 2 $\theta$  steps of 0.02° using a Cu  $K\alpha$  radiation. The Mössbauer spectroscopy was performed with a Mössbauer DRIVE UNIT MR-260A with a  $^{57}\text{Co}/\text{Rh}$  source matrix as a radiation source. The chemical composition was examined by elemental analysis (Vario-EL Cube, Elementar Analysensysteme) for C and N and by inductively coupled plasma analysis (iCAP 6000 Radial, Thermo Fisher Scientific, Inc.) for Fe and Na. TG analysis was conducted on a DSC/DTA-TG instrument (STA 449 F3 Jupiter, NETZSCH-Gerätebau GmbH) at a heating rate of 5°C/min under an atmospheric environment. FT-IR and Raman spectra were recorded using an FT-IR spectrophotometer

(Spectrum 100, PerkinElmer Inc.) and a DXR Raman Microscope (DXR, Thermo Fisher Scientific, Inc.) equipped with an argon-ion laser (633 nm), respectively.

The galvanostatic charge-discharge tests were conducted using a battery test system (Land CT2001A model, Wuhan Jinnuo Electronics Co., Ltd.). All cyclic voltammetric experiments were performed on a CHI electrochemical workstation (CHI 670D, CHI Instrument Co.). Electrochemical impedance spectroscopy (EIS) was performed using Solartron equipment (SI 1287 + SI 1260, Solartron Analytical, Ltd.) within a frequency range of 0.1 Hz to 100 kHz at the open-circuit potential. The amplitude of the alternating voltage was 5 mV. All electrochemical experiments were carried out at 25°C.

## **S2. The thermo gravimetric (TG) analysis of GO, PB, RGOPC1, RGOPC2 and RGOPC3**

Fig. S1a shows the thermo gravimetric (TG) curve of GO. Obviously, the oxide groups on the GO are decomposed at about 220°C and resulting the weight loss of GO which are consist with the reference.<sup>[2]</sup> Fig. S1b shows the TG curve and the differential scanning calorimetric (DSC) curve of PB. PB will begin to slight decompose when the temperature is increased to above 240°C. Thus, the weight loss of PB below 240°C is mainly attributed to absorbed water and zeolitic water. The water content in PB was sensed to be 11.5 wt.%. Fig. S1c, S1d and S1f show the thermo gravimetric (TG) curve of RGOPC1, RGOPC2 and RGOPC3, respectively. The weight losses of RGOPC1, RGOPC2 and RGOPC3 at 240°C were 8.6 wt.%, 6 wt.% and 5.1 wt.%, respectively. However, the water contents in these samples cannot be detected precisely which is due to the mild decomposition of RGO.

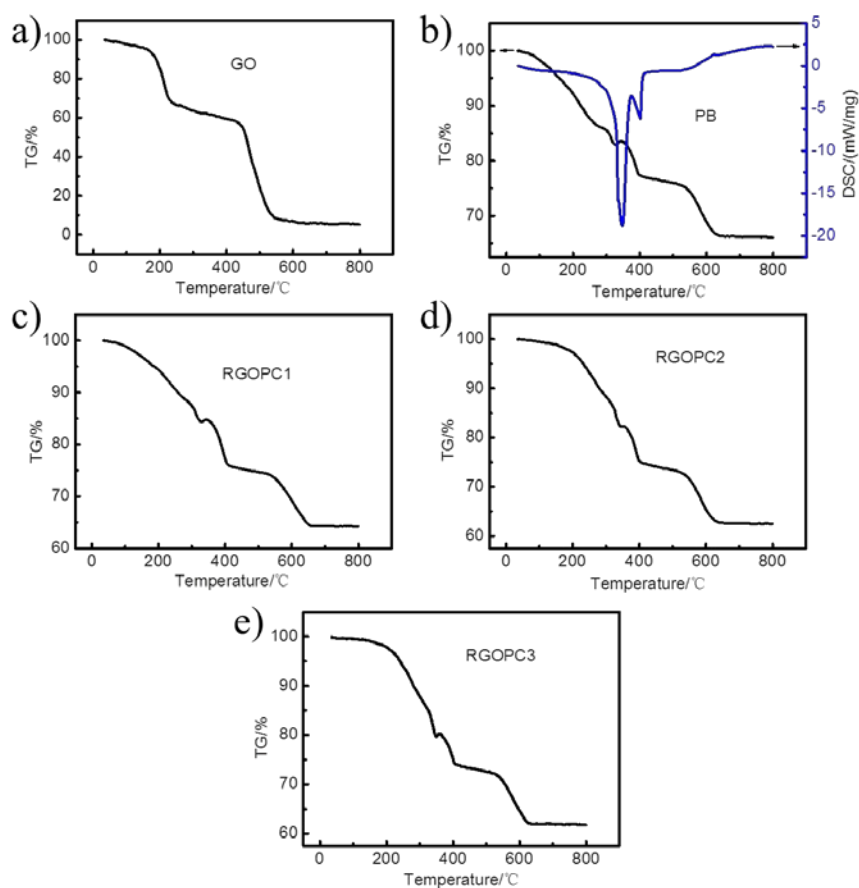

Figure S1. (a) The thermo gravimetric (TG) curve of GO. (b) The thermo gravimetric (TG) curve and the differential scanning calorimetric (DSC) curve of PB. The thermo gravimetric (TG) curves of RGOPC1 (c), RGOPC2 (d) and RGOPC3 (f). All TG and DSC tests were performed under atmospheric environment.

### S3. The SEM images of RGOPC3 and GOPC3

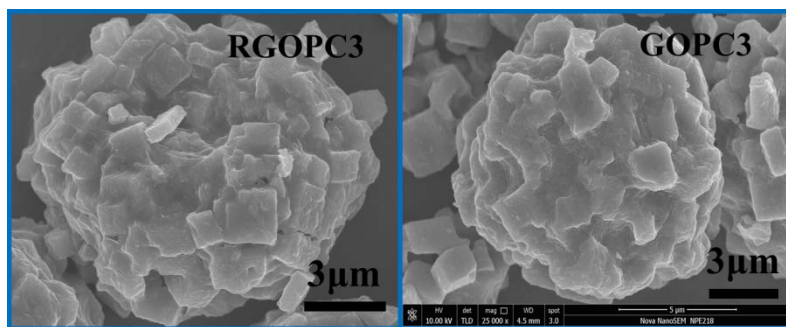

Figure S2. The SEM images of RGOPC3 and GOPC3.

#### S4. Cyclic voltammograms, FT-IR spectra of PB and RGOPCs

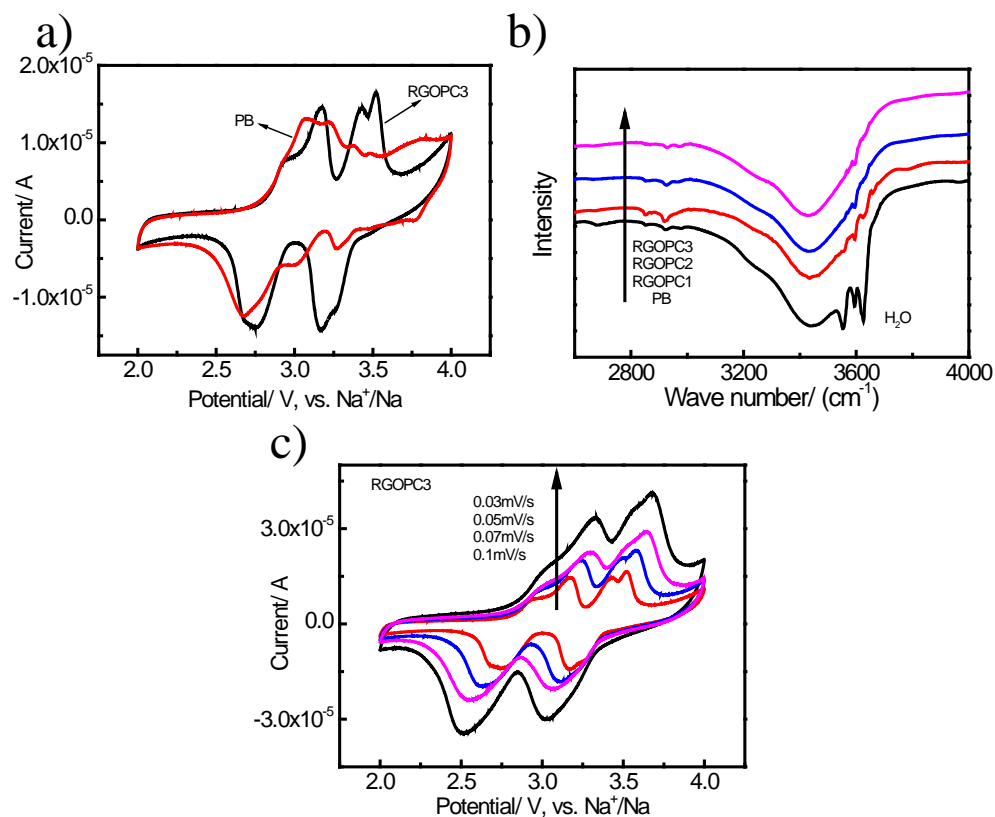

Figure S3. (a) Cyclic voltammograms of PB and RGOPC3 recorded at a scan rate of 0.03 mV/s between 2 V and 4 V. (b) FT-IR spectra of PB, RGOPC1, RGOPC2 and RGOPC3. (c) The Cyclic voltammograms of RGOPC3 at different scan rate between 2V and 4V.

#### S5. The Mössbauer spectra of charged PB and charged RGOPC3

In order to determine the different reactivity of Fe1 in the PB and RGOPCs, we performed the Mössbauer analysis of the cycled electrode of PB and the cycled electrode of RGOPC3. These two electrodes were charged/discharged at 30 mA/g between 2.0~4.0V for three cycles, and then fully charged to 4.0V.

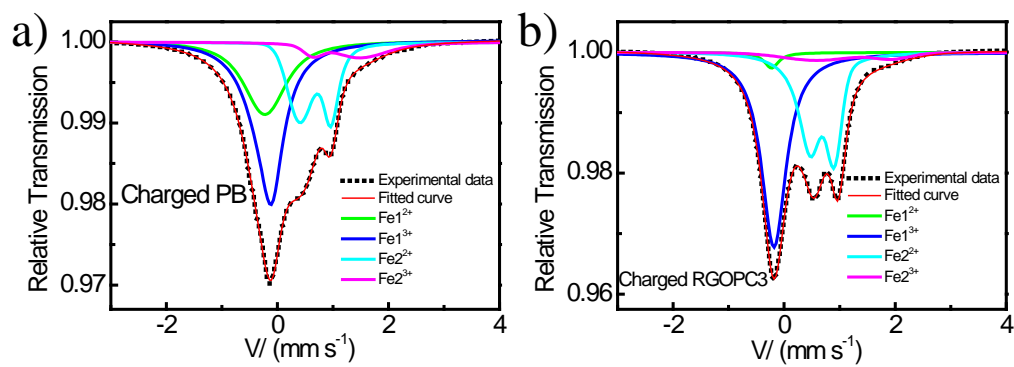

Figure S4. (a) Mössbauer spectrum of charged PB. (b) Mössbauer spectrum of charged RGOPC3.

### S6. The Rietveld refinement results of the XRD patterns (PB and RGOPCs)

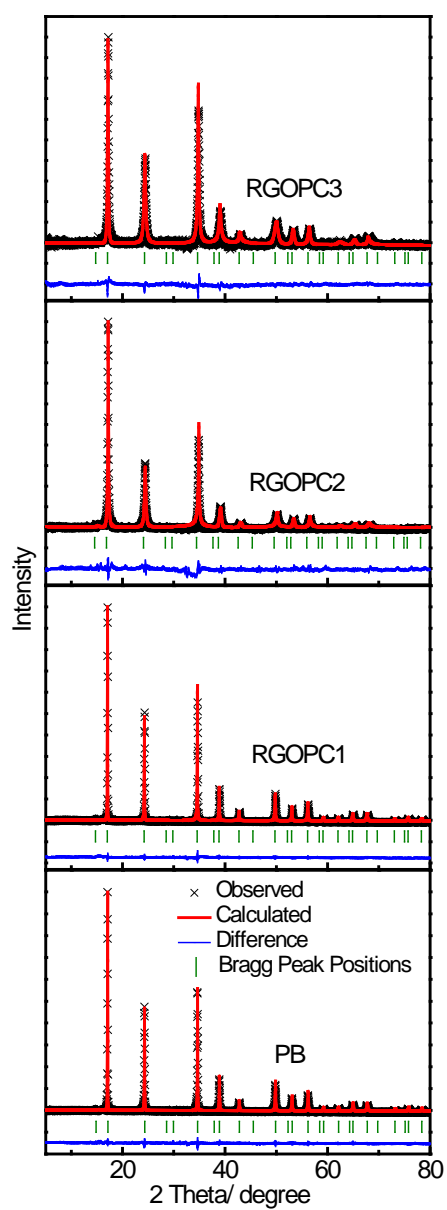

Figure S5. Rietveld refined room temperature XRD patterns of PB, RGOPC1, RGOPC2 and RGOPC3.

**Table S1. The occupation of the atoms and d-spacing of PB, RGOPC1, RGOPC2 and RGOPC3.**

|           | PB       | RGOPC1   | RGOPC2   | RGOPC3   |
|-----------|----------|----------|----------|----------|
| Fe2       | 1        | 1        | 1        | 1        |
| Fe1       | 0.79     | 0.79     | 0.79     | 0.79     |
| Na        | 0.81     | 0.81     | 0.81     | 0.81     |
| C         | 0.802    | 0.791    | 0.734    | 0.703    |
| N         | 0.802    | 0.791    | 0.734    | 0.703    |
| O         | 0.307    | 0.284    | 0.103    | 0.091    |
| D-spacing | 10.3423Å | 10.3361Å | 10.2735Å | 10.2591Å |
| Rp        | 4.22%    | 4.41%    | 5.36%    | 5.22%    |
| Rwp       | 5.02%    | 5.83%    | 7.14%    | 6.47%    |

### S7. The functions of GO during the co-heating process for removing coordinated water

To verifying the functions of GO during the co-heating process for removing coordinated water, we first analyzed the FT-IR spectra of the pure PB before and after heating at the same conditions (Figure S6a). Only tiny differences were observed. The pure PB after heating still presents the peaks belonging to H<sub>2</sub>O at 3556 cm<sup>-1</sup>, 3594 cm<sup>-1</sup> and 3627 cm<sup>-1</sup> obviously. From the charge/discharge curve of PB after heating (Figure S6b), one discharge platform was delivered. From the Raman spectra (Figure S6c), the ratios of Fe(CN)<sub>6</sub><sup>4-</sup>/ Fe(CN)<sub>6</sub><sup>3-</sup> were similar. Hence, the coordinated water cannot be removed under simple heating process for pure PB without GO. On the other hand, the peaks of coordinated water on the FT-IR spectra of GOPC3 and RGOPC3 (Figure S6d), were significantly decreased. The ratios of Fe(CN)<sub>6</sub><sup>4-</sup>/ Fe(CN)<sub>6</sub><sup>3-</sup> for RGOPC3 was also decreased (Figure S6f). Thus, the original GO applied to covering PB played pivotal roles in the heating process.

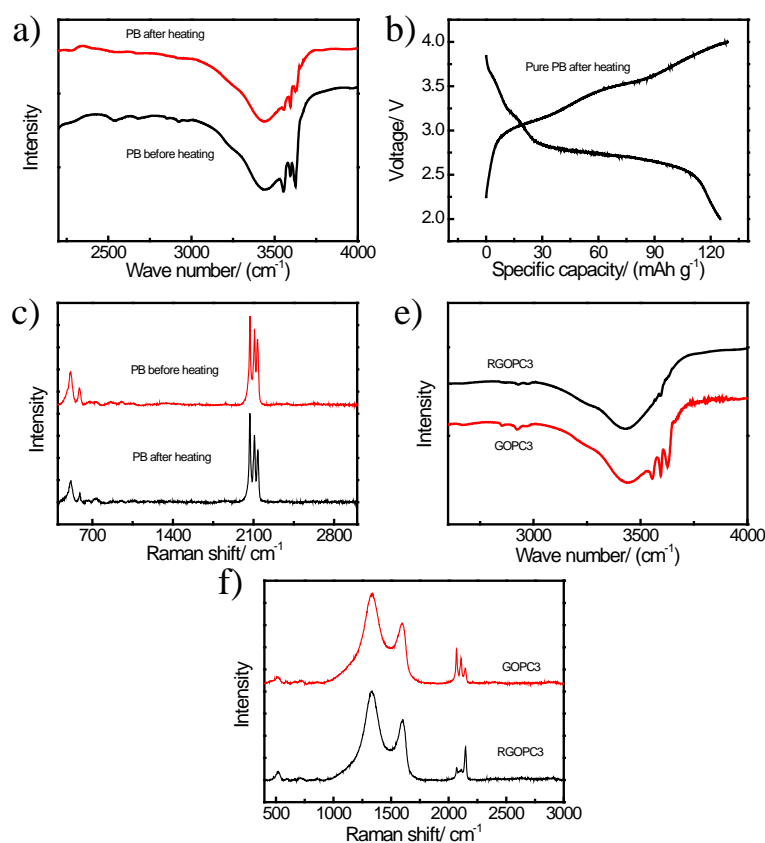

Figure S6. (a) The FT-IR spectra of PB before and after heating. (b) The charge/discharge curves of pure PB after heating between 2V-4V at 30 mA/g. (c) The Raman spectra of pure PB before and after heating. (d) The IR spectra and (f) the Raman spectra of GOPC3 and RGOPC3.

As GO consists of graphene and oxide groups, in order to explore the thermal reaction mechanism of the GO/PB composite during co-heating, the GO/PB composite with 9wt.% GO content (GOPC3-1) and the graphene/PB composite with 9wt.% graphene content (GPC3-1) were both heated under 220°C with the same conditions to point out the role of graphene and oxide groups directly. The graphene was highly reduced graphene oxide. The GPC3-1 cannot be synthesized by spray drying because the PB and graphene would separate rather than to form composite during spray drying. Thus, the GOPC3-1 and GPC3-1 were synthesized by the solution-evaporation method. For synthesis of GOPC3-1, the 9 wt.% GO and 91wt.% PB were stirred together in the aqueous solutions, and then evaporated at 80°C and under stirring to form dried film. For GPC3-1, the synthetic process is similar where just replacing the GO by the highly reduced graphene oxide. The fabricated films were heated under atmosphere and at 220°C for 3h, and ball milled and dried again as cathode materials. Fig. S7a and S7b show the charge/discharge curves of RGOPC3-1 and GPC3-1 after heating. The GPC3-1 after heating only delivered one voltage platform of Fe<sup>2+</sup>. That is to say, the oxide groups are necessary for



the original composites to remove coordinating water. We also performed the charge/discharge curves of RGOPC3 heated at 180°C (Figure S7c). The GOPC3 heated at 220°C (RGOPC3) delivered two distinct voltage platforms of Fe1 and Fe2. But the GOPC3 heated at 180°C presents one voltage platform of Fe2. The oxide groups on the GO would decompose at 220°C but kept stable at 180°C. Hence, the decomposition of oxide groups on the GO is essential to induce the removing of coordinated water. In the GOPC, the GO covered the surface of PB well indicating that the decomposition of oxide groups also happens on the PB surface at 220°C.

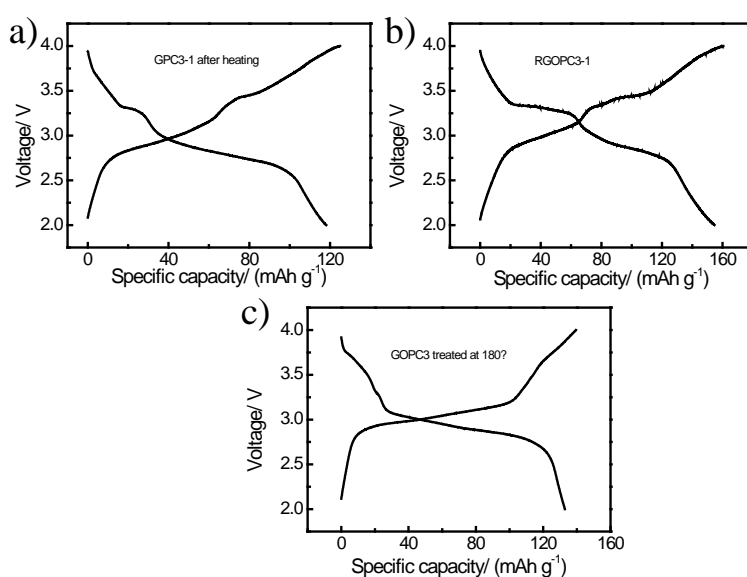

Figure S7. The charge/discharge curves of (a) GPC3-1 and (b) RGOPC3-1 after heating between 2V-4V at 30 mA/g. (c) The charge/discharge curves of GOPC3 (heated at 180°C) between 2V-4V at 30 mA/g.

## S8. The charge/discharge curve of RGO

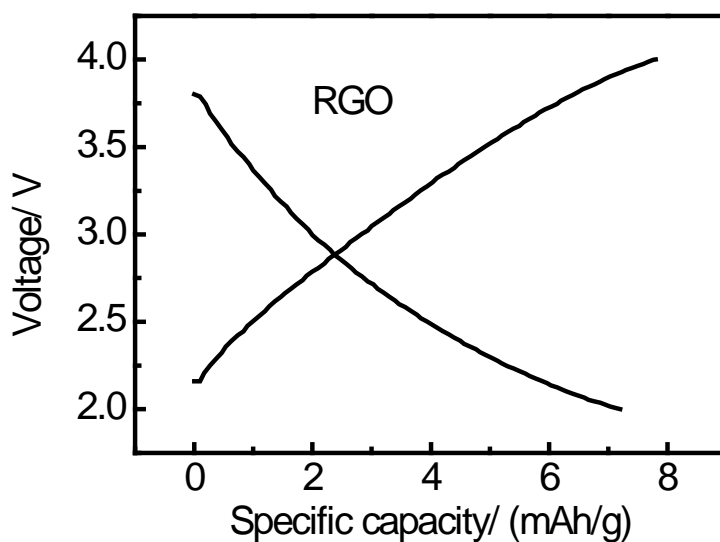

Figure S8. The galvanostatic charge–discharge profiles of RGO between 2.0V-4.0V at 30 mA/g.

### S9. The fitted parameters of the Mössbauer spectra of pristine PB and RGOPC3

Table S2. The fitted Mössbauer parameters of pristine PB and RGOPC3.

|                               | PB                                    |                                                  | RGOPC3                                |                                                  |
|-------------------------------|---------------------------------------|--------------------------------------------------|---------------------------------------|--------------------------------------------------|
|                               | Isomer shift<br>(mm s <sup>-1</sup> ) | Quadrupole<br>splitting<br>(mm s <sup>-1</sup> ) | Isomer shift<br>(mm s <sup>-1</sup> ) | Quadrupole<br>splitting<br>(mm s <sup>-1</sup> ) |
| (Low spin) Fe <sup>12+</sup>  | -0.228                                | ~0                                               | -0.27                                 | ~0                                               |
| (Low spin) Fe <sup>13+</sup>  | -0.092                                | ~0                                               | -0.12                                 | ~0                                               |
| (High spin) Fe <sup>23+</sup> | 0.647                                 | 0.468                                            | 0.68                                  | 0.491                                            |
| (High spin) Fe <sup>22+</sup> | 1.2                                   | 1.04                                             | 1.195                                 | 1.13                                             |

### S10. The first charge/discharge curves of PB and RGOPCs

In the first charge/discharge curves of PB and RGOPCs (Figure S9), we can see that the first discharge capacities of PB, RGOPC1, RGOPC2 and RGOPC3 were 71 mAh/g, 79.9 mAh/g, 90.1 mAh/g and 100.3 mAh/g, respectively. In other words, the initial valence states of redox ions in these four samples are different. It is consistent with the Raman spectra of PB and RGOPCs in Figure 4c.

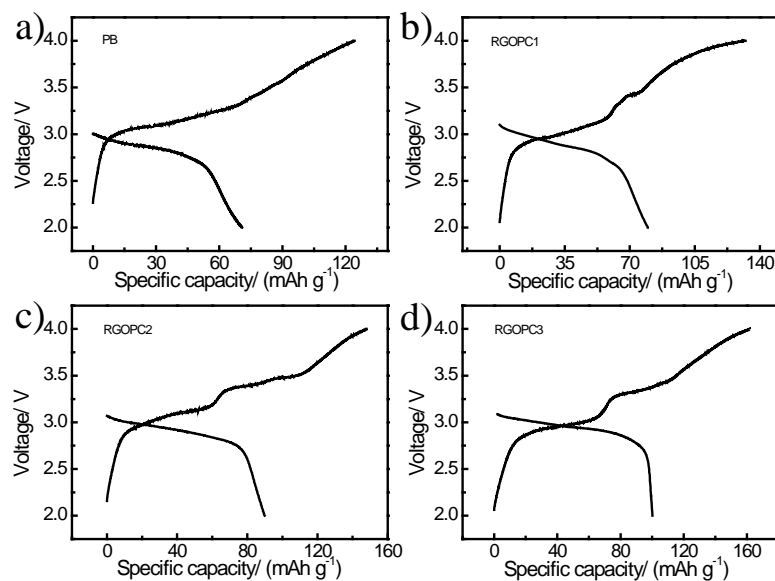

Figure S9. The first galvanostatic charge–discharge profiles of PB, RGOPC1, RGOPC2 and RGOPC3 between 2.0V-4.0V at 30 mA/g.

### S11. The ratios of $\text{Fe}(\text{CN})_6^{4-}/\text{Fe}(\text{CN})_6^{3-}$ of PB, RGOPC1, RGOPC2 and RGOPC3

The broad peaks at  $1333.5\text{ cm}^{-1}$  and  $1604.2\text{ cm}^{-1}$  are assigned to the RGO. With increasing RGO content, the peaks at  $2068.2\text{ cm}^{-1}$  and  $2108.4\text{ cm}^{-1}$ , which belong to the  $\text{Fe}(\text{CN})_6^{4-}$  group, became weaker. However, the intensity of the peak at  $2137.7\text{ cm}^{-1}$ , which is attributed to the  $\text{Fe}(\text{CN})_6^{3-}$  groups, increased.<sup>[3,4]</sup>

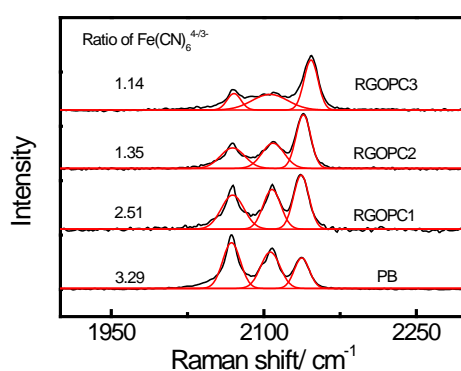

Figure S10. The Raman spectra of PB, RGOPC1, RGOPC2 and RGOPC3. The red lines are fitting results.

### S12. The Raman spectra of RGOPC3 with different heating times

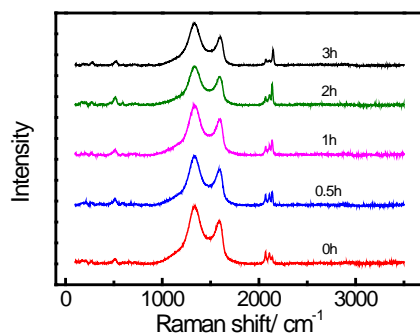

Figure S11. The Raman spectra of RGOPC3 with different heating times.

**S13. The charge/discharge curve and the FT-IR spectra of RGOPC3 treated by water and dried again**

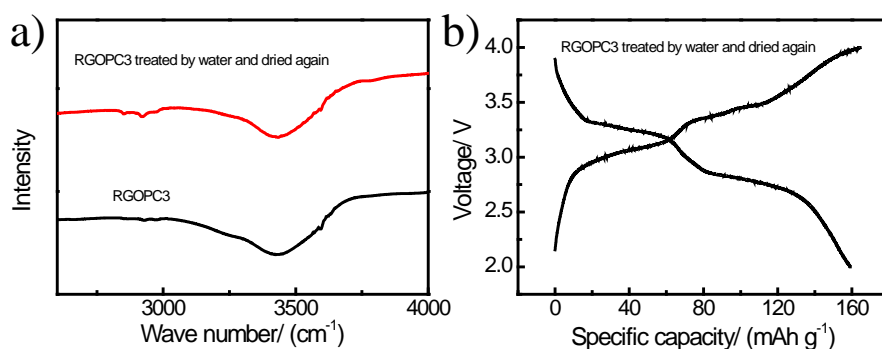

Figure S12. The IR spectra (a) and the charge/discharge curve (b) of RGOPC3 treated by water and dried again

**S14. The discharge curves of RGOPC3 and the Nyquist plots of PB and RGOPCs**

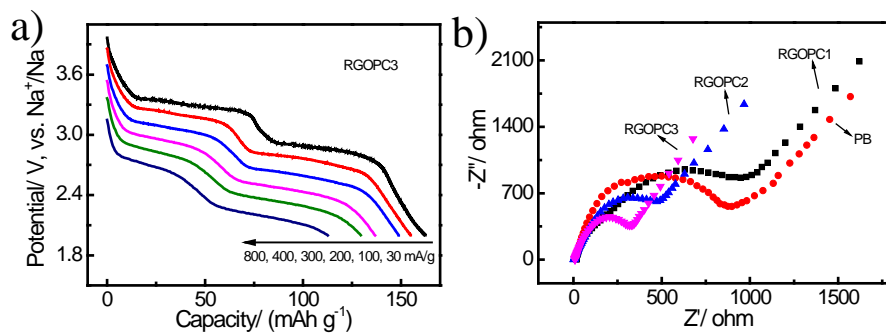

Figure S13. (a) The galvanostatic discharge curves of RGOPC3 at different current densities between 2 V and 4 V. (b) The Nyquist plots of the sodium-ion cells with PB, RGOPC1, RGOPC2 and RGOPC3 as cathodes after ten charge/discharge cycles at 200 mA/g.

### References:

1. X. Yang, L. Qiu, C. Cheng, Y. Wu, Z.-F. Ma and D. Li, *Angew. Chem. Int. Ed.*, 2011, **50**, 7325.
2. G.-W. Zhou, J. Wang, P. Gao, X. Yang, Y.-S. He, X.-Z. Liao, J. Yang and Z.-F. Ma, *Ind. Eng. Chem. Res.*, 2013, **52**, 1197.
3. D. Yang, L. Han, Y. Yang, L.-B. Zhao, C. Zong, Y.-F. Huang, D. Zhan and Z.-Q. Tian, *Angew. Chem. Int. Ed.*, 2011, **50**, 8679.
4. M. M. Barsan, L. S. Butler, J. Fitzpatrick and D. F. R. Gilson, *J. Raman Spectrosc.*, 2011, **42**, 1820.
